# Supplementary material for: Protein sumoylation and phosphorylation intersect in Arabidopsis signaling
Source: PubMed Central journal article supplement (PMC5518230; doi:10.1111/tpj.13575), 2017-06-04
Supplement: TPJ-91-505-s001.pdf [file TPJ-91-505-s001.pdf]

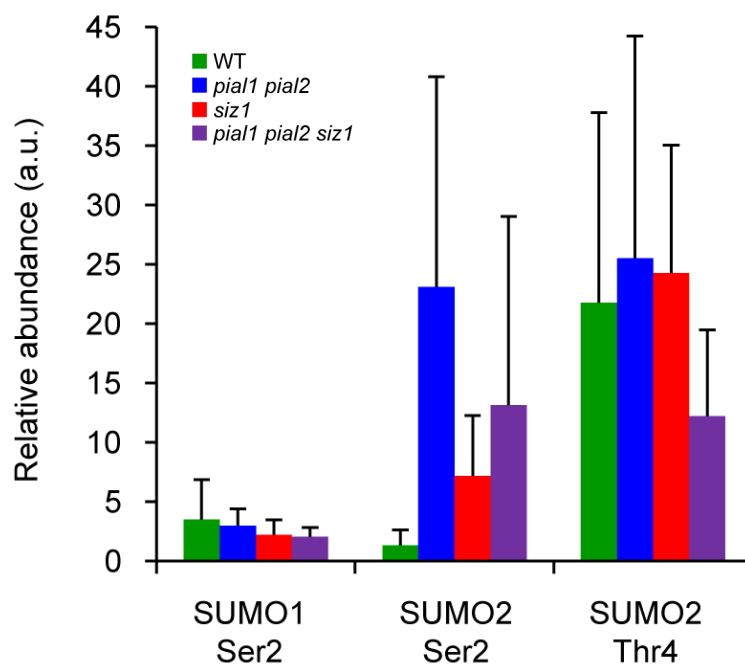

**Figure S1.** Relative abundance of SUMO1 and SUMO2 phosphorylation on Ser<sup>2</sup> and Thr<sup>4</sup>. Values presented are means of 5 biological replicates +/- standard deviation.
