# Supplementary material for: Protein sumoylation and phosphorylation intersect in Arabidopsis signaling
Source: PubMed Central journal article supplement (PMC5518230; doi:10.1111/tpj.13575), 2017-06-04
Supplement: TPJ-91-505-s002.pdf [file TPJ-91-505-s002.pdf]

(c)

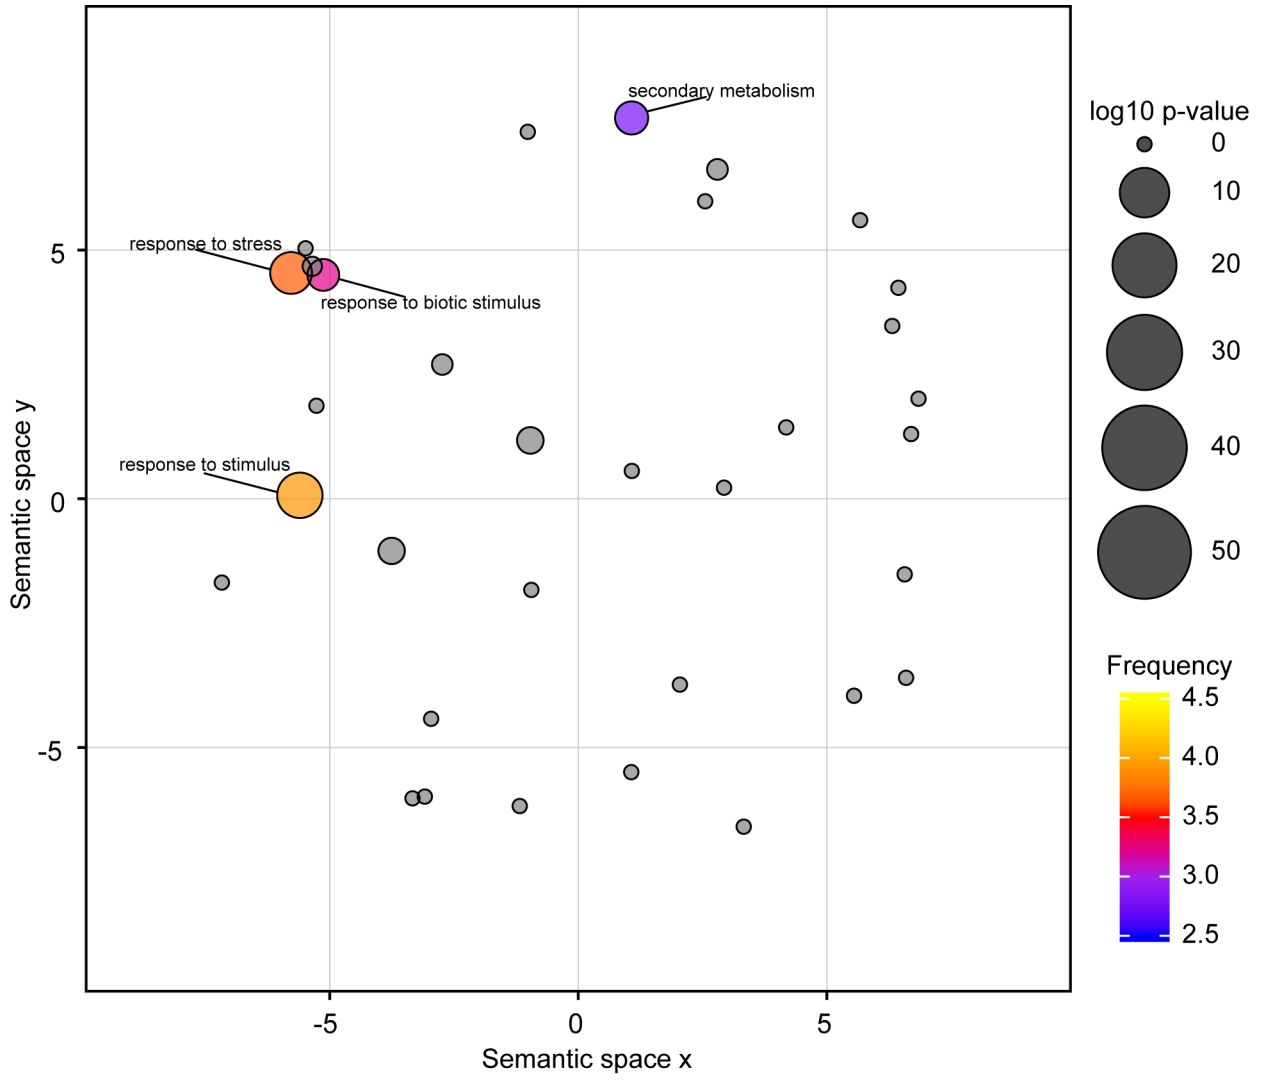

(d)

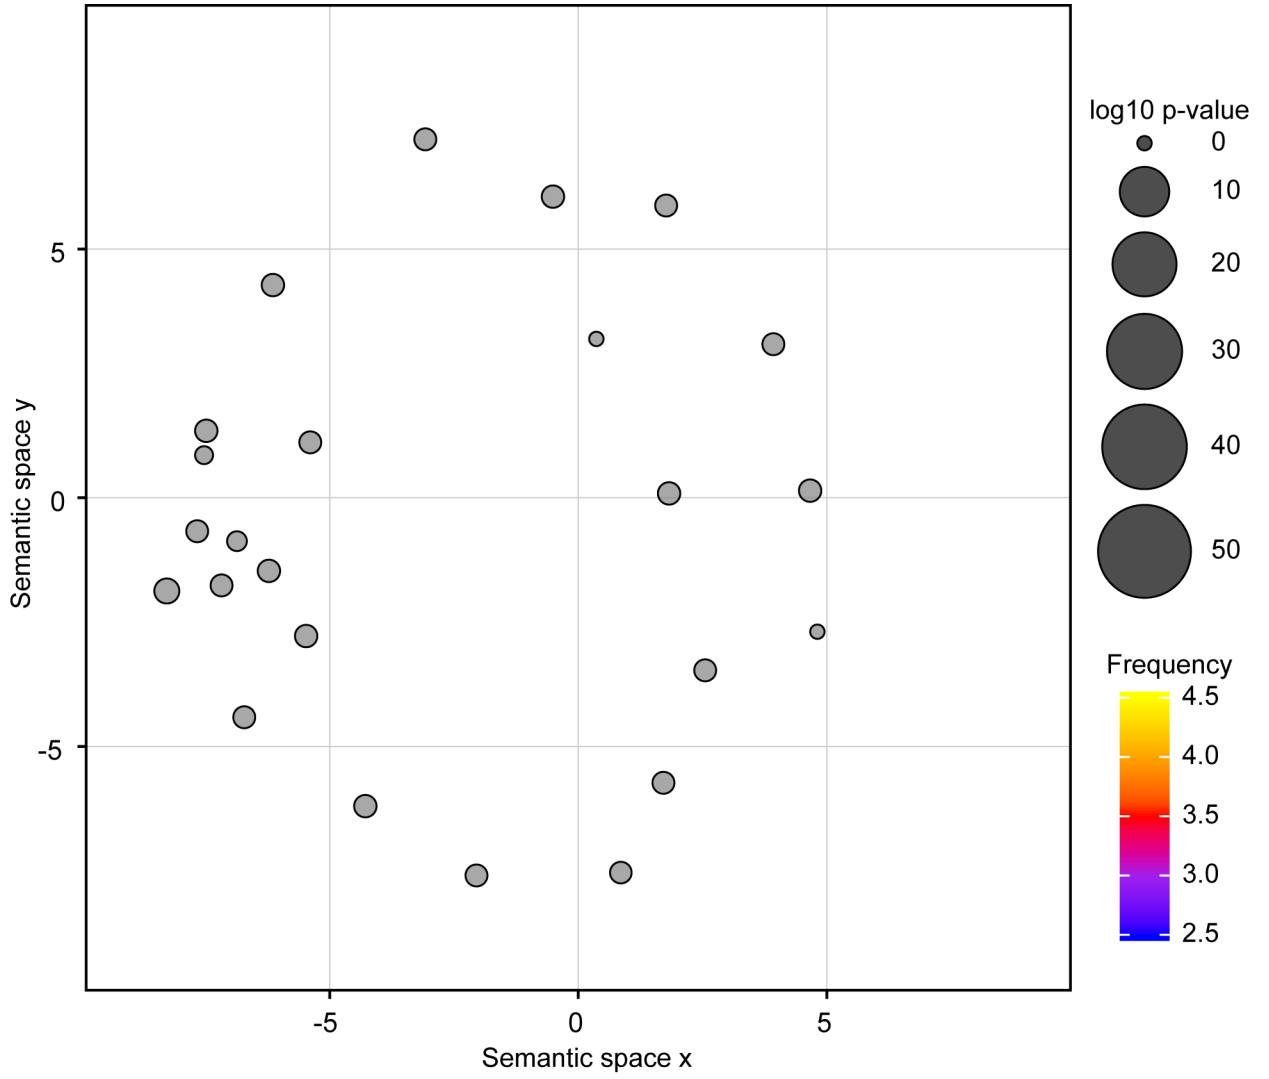

(e)

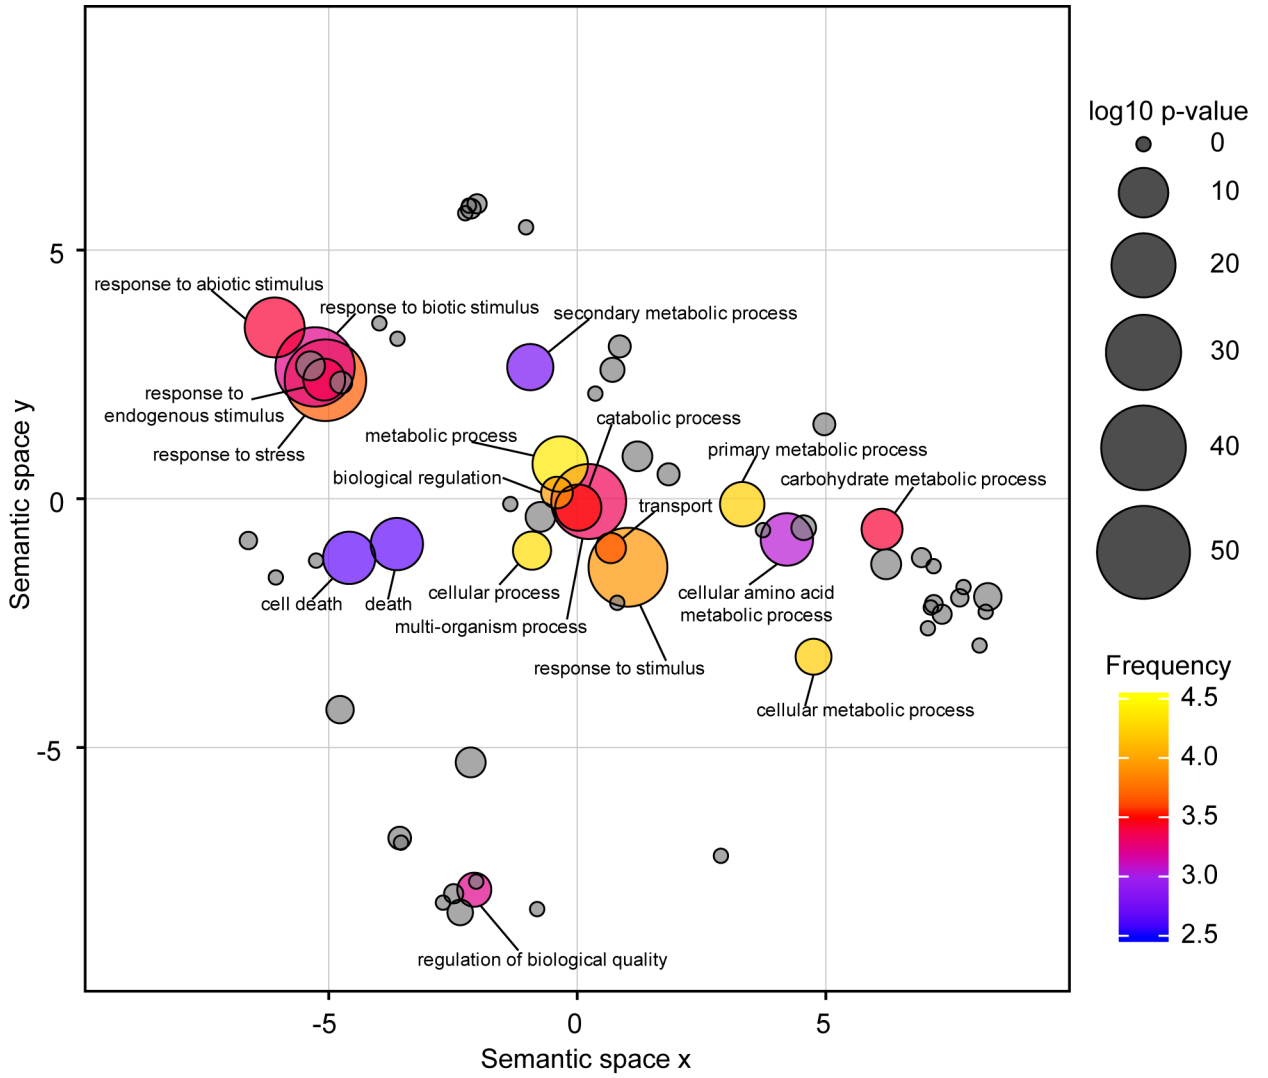

(f)

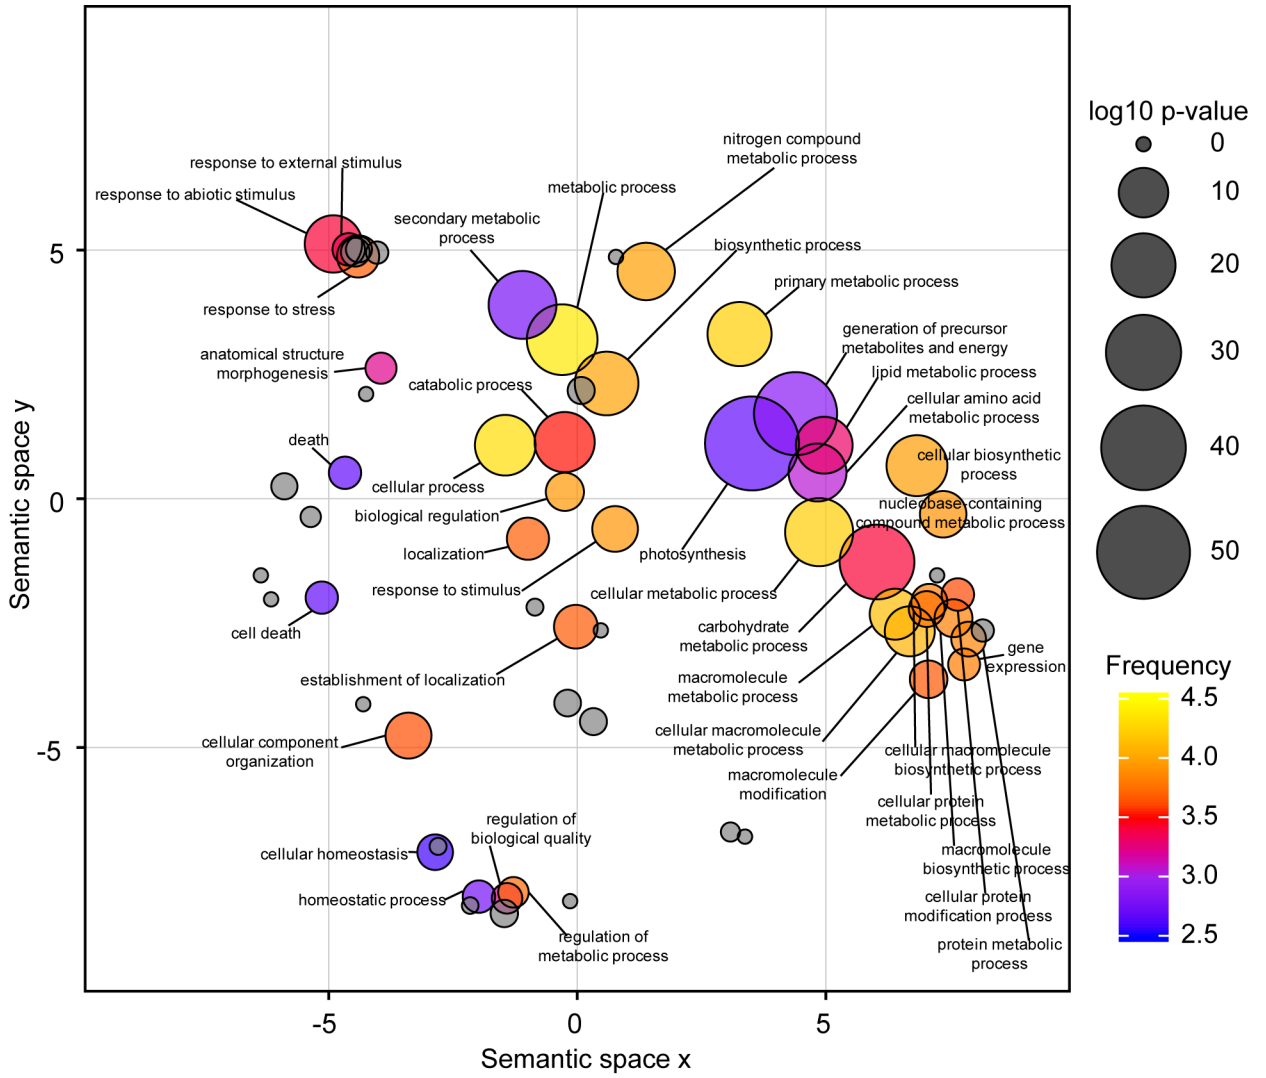

(g)

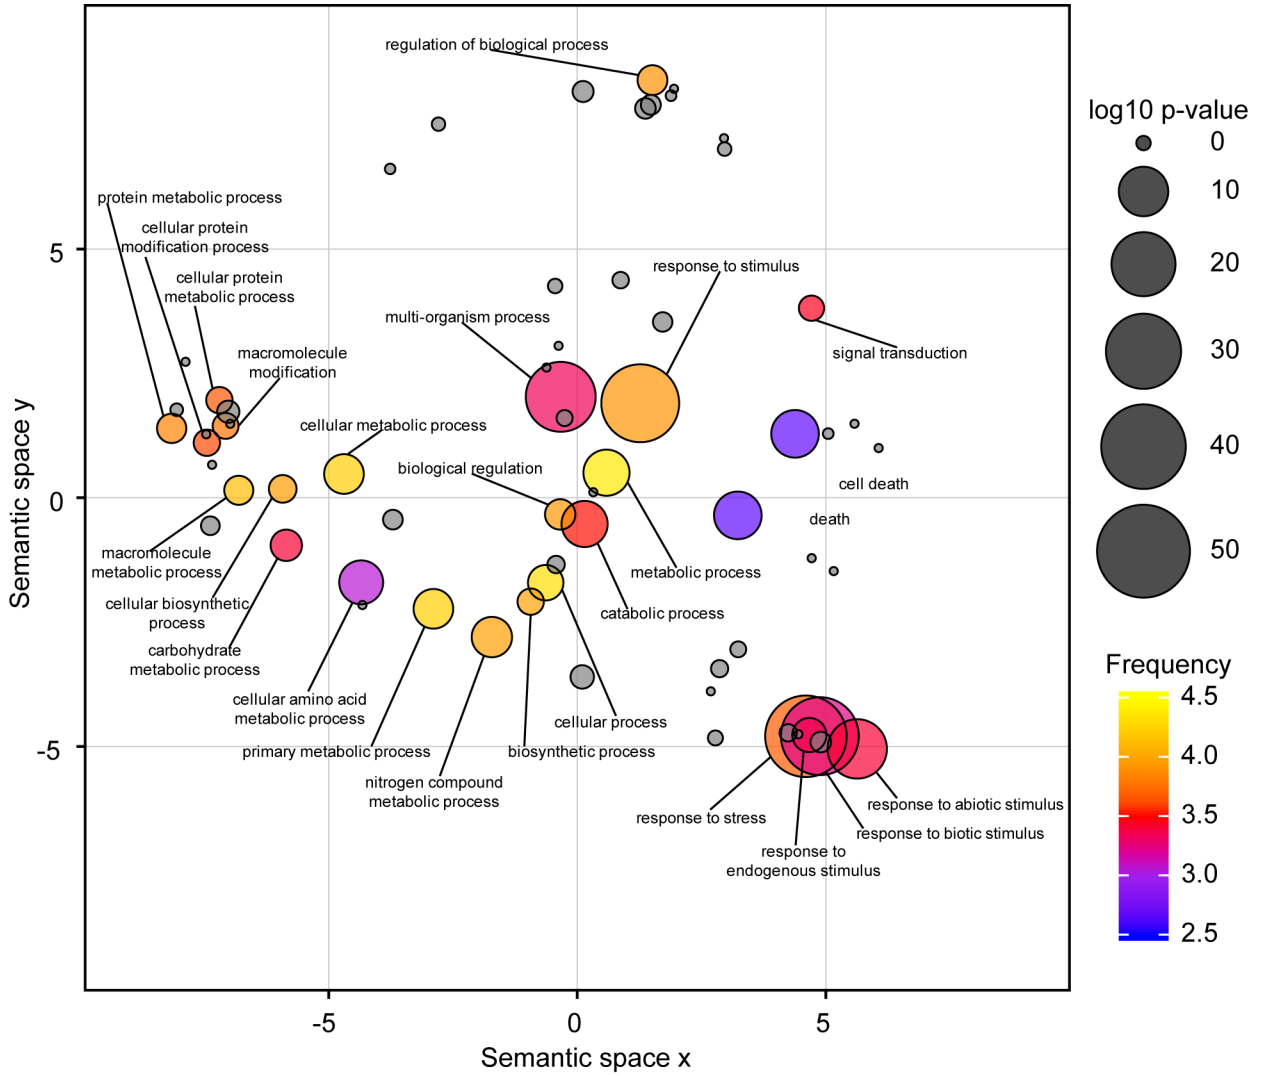

(h)

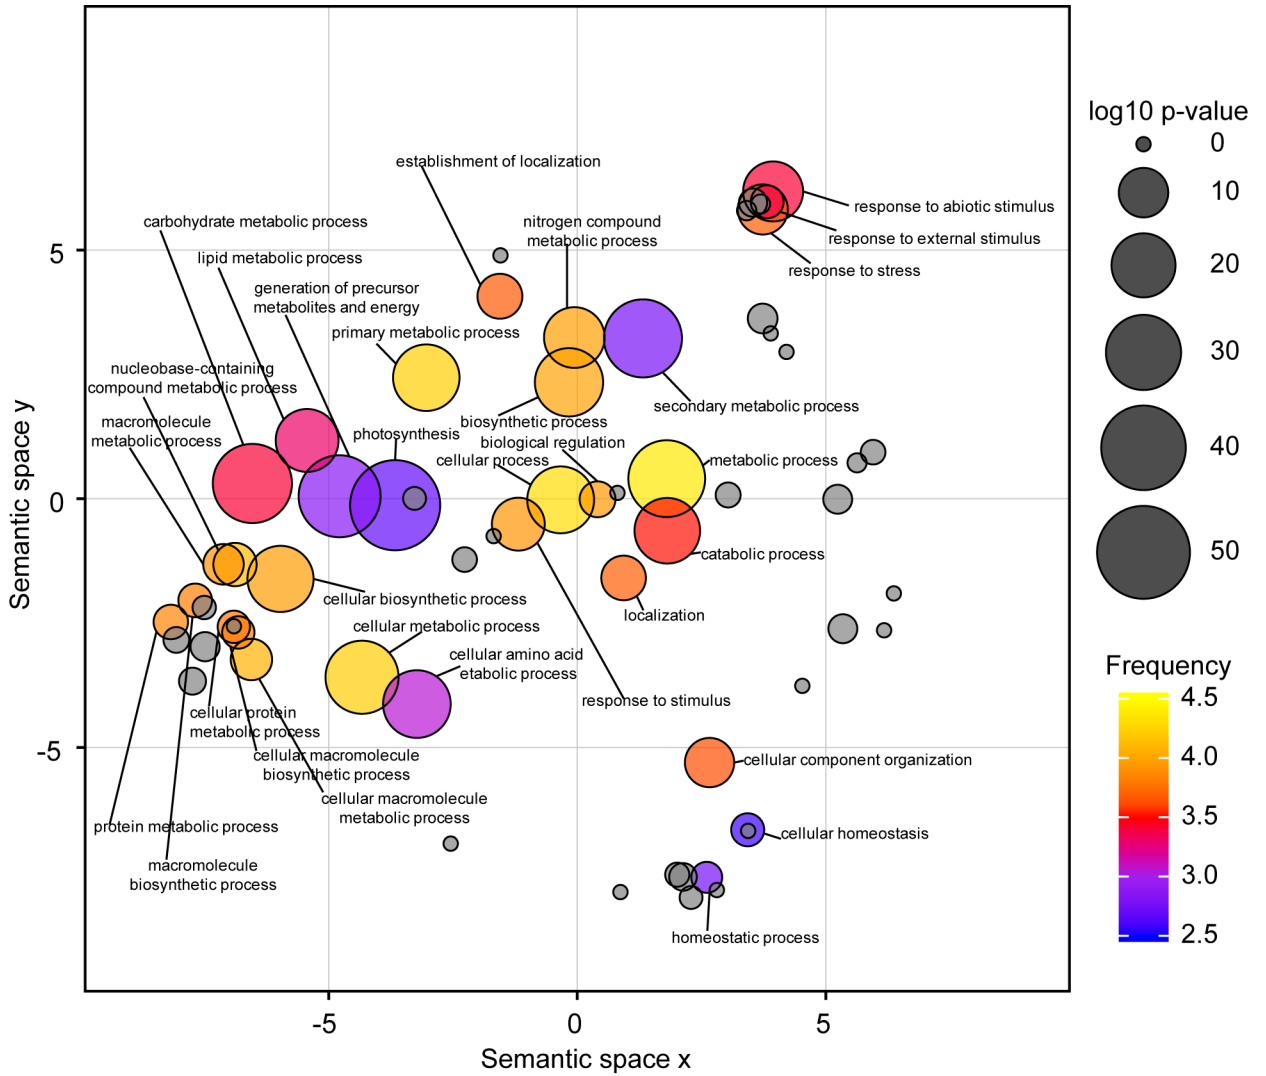

**Figure S2.** Graphic display of up- and downregulated proteins with complete annotation of significantly enriched GO categories.

Panels (c) to (h) are identical to those of Figure 3, but contain the names of all significantly enriched GO terms. For individual proteins, see Table S4.
